# Supplementary material
Source: publisher site journal article supplement (https://www.dovepress.com/article/495654)
Supplement: Supplementary file 1 [file get_supplementary_file.php]

**Supplementary Material (translated by DeepL.com)**

Questions based on:

Chokroverty S. *Questions & answers about sleep apnea.* Jones & Bartlett Publishers; 2009.

**PAP**

1. My sleep doctor has diagnosed obstructive sleep apnea and recommended positive airway pressure (PAP) therapy. What is PAP therapy and how does it affect my obstructive sleep apnea?

Positive airway pressure therapy (PAP therapy) is a treatment method for obstructive sleep apnea (OSA) in which pressurized air is continuously passed through the airways to keep them open during sleep. This prevents the collapse of the upper airways, which is typical of OSA and leads to repeated interruptions in breathing.

**Types of PAP therapy:**

1. **CPAP (Continuous Positive Airway Pressure):**
   - Provides a constant, fixed pressure during the entire breathing cycle.
   - Most common form of PAP therapy.
2. **BiPAP (Bilevel Positive Airway Pressure):**
   - Provides two different pressure levels: a higher pressure during inhalation (IPAP) and a lower pressure during exhalation (EPAP).
   - Can be beneficial for patients with higher pressure requirements or concomitant diseases such as COPD.
3. **APAP (Auto-titrating Positive Airway Pressure):**
   - Automatically adjusts the pressure to the patient's individual breathing needs in real time.
   - Detects breathing patterns and adjusts the pressure accordingly.

**Mode of action of PAP therapy for obstructive sleep apnea:**

1. **Verhinderung des Kollapses der Atemwege:**
   - The constant or adjusted positive air pressure keeps the airways open during sleep, preventing the repetitive pauses in breathing that are typical of OSA.
2. **Improvement in sleep quality**
   - By reducing breathing interruptions, frequent interruptions to sleep can be avoided. This leads to deeper and more restful sleep.
3. **Reduction of symptoms:**
   - Symptoms such as loud snoring, daytime sleepiness, concentration problems and headaches are usually significantly reduced by regular use of PAP therapy.
4. **Long-term health benefits:**
   - Reducing the risk of OSA-related complications such as high blood pressure, cardiovascular disease, stroke and diabetes.

**Application of PAP therapy:**

- Mask: A well-fitting mask, which is worn over the nose or nose and mouth, is crucial for the effectiveness of the therapy.
- Device: The PAP device generates the necessary air pressure and is often equipped with modern features that increase comfort, such as humidifiers and quiet operating noises.
- Adjustment and monitoring: Regular follow-up examinations and adjustments are important to ensure the optimum pressure setting and to correct any problems such as mask leaks.

**Conclusion:**

PAP therapy is an effective and widely used treatment for obstructive sleep apnea. It helps to keep the airway open, improves sleep quality and reduces the health risks associated with untreated OSA. Consistent use and regular review of therapy settings by your sleep physician are critical to the success of the treatment.

___________________________________________________________________

2 Is PAP therapy covered by my health insurance (in Germany)?

In Germany, Positive Airway Pressure (PAP) therapy is generally covered by statutory health insurance (GKV). However, the conditions for reimbursement may vary. Here are the basic steps and requirements:

1. **Doctor's prescription: First of all, you need a doctor's prescription for PAP therapy. This is usually issued after a diagnosis in a sleep laboratory, where it is determined that PAP therapy is medically necessary.**
2. **Approval by the health insurance company:** With the doctor's prescription, you submit an application to your health insurance company. The health insurance company checks the application and usually approves the assumption of costs if there is a medical necessity.
3. **Coverage of costs for devices and accessories:** Health insurance companies generally cover the costs of the PAP device and necessary accessories such as masks and tubes. However, certain models may be preferred or only partially reimbursed. Some health insurance companies also provide devices on loan.
4. **Regular checks and proof of use:** In some cases, health insurance companies require proof of regular use of the device in order to ensure continuous coverage of costs.
5. **Own contribution:** In some cases, small co-payments or own contributions may be required for certain components.

It is important that you check directly with your health insurance provider for exact details and requirements. Different health insurance companies may have different policies and procedures. It can also be helpful to ask the treating doctor or sleep laboratory for assistance with the application process.

3 What types of PAP therapy are there and how do they work?

Positive airway pressure (PAP) therapy is used to treat sleep apnea and other breathing disorders. There are different types of PAP devices, all of which aim to keep the airway open during sleep by creating continuous air pressure. The main types of PAP therapy are:

1. **CPAP (Continuous Positive Airway Pressure)**:
   - **How it works:** CPAP devices deliver a constant and fixed pressure of air through a mask that the patient wears during sleep. This continuous pressure prevents the airways from collapsing and keeps them open.
   - **Application:** Widely used for the treatment of obstructive sleep apnea (OSA).
2. **APAP (Automatic Positive Airway Pressure)**:
   - **How it works:** APAP devices automatically adjust the pressure to the patient's needs. The pressure is continuously monitored and adjusted based on breathing and any airway obstructions during sleep.
   - **Application:** Suitable for patients who have variable pressure requirements or where the pressure requirement fluctuates during the night.
3. **BiPAP (Bilevel Positive Airway Pressure)**:
   - **How it works:** BiPAP devices offer two pressure levels: a higher pressure when inhaling (IPAP) and a lower pressure when exhaling (EPAP). This makes breathing easier, especially for patients who have difficulty breathing out against a constant high pressure.
   - **Application:** Commonly used in patients with central sleep apnea, chronic obstructive pulmonary disease (COPD) or other breathing disorders where additional breathing support is required.
4. **ASV (Adaptive Servo-Ventilation)**:
   - **How it works:** ASV devices are advanced PAP devices that monitor the patient's airflow in real time and dynamically adjust pressure to stabilize breathing patterns. They are particularly useful in the treatment of complex sleep apnea and central sleep apnea.
   - **Application:** Used in patients with complex breathing disorders who do not respond adequately to CPAP or BiPAP therapy.
5. **AVAPS (Average Volume Assured Pressure Support)**:
   - **How it works:** AVAPS devices combine pressure support with volume control. They adjust the pressure to ensure a certain tidal volume and are therefore particularly suitable for patients with hypoventilation and other hypoventilatory breathing disorders.
   - **Application:** Commonly used in patients with neuromuscular diseases or other chronic respiratory problems.

Each of these therapies has specific areas of application and is selected based on the patient's individual diagnosis and needs. The right PAP therapy is usually selected by a sleep physician after a comprehensive diagnosis and sleep study.

4. Where can I get my PAP equipment?

You can obtain PAP equipment, i.e. personal protective equipment, from various sources. Here are a few options:

1. **Online-Shops**: There are numerous specialized online stores that offer personal protective equipment. The best known include:
   - **Berufsbekleidung24:** Offers a wide selection of workwear and protective equipment.
   - **Engelbert Strauss:** Known for high-quality workwear and protective equipment.
   - **Amazon:** There is also a large selection of protective equipment here, but you should pay attention to the quality and reviews of the products.
2. **Local specialist stores:** In many cities, there are specialist stores for workwear and protective equipment. These often offer personal advice and the opportunity to try on the equipment before buying.
3. **DIY stores:** Large DIY chains such as Bauhaus, Obi or Hornbach also stock a selection of personal protective equipment.
4. **Specialist occupational safety retailers:** Companies such as Würth or Keller & Kalmbach specialize in the sale of workwear and protective clothing and also offer a wide range of personal protective equipment.
5. **Directly from the manufacturer:** Some manufacturers of protective equipment also offer their products for sale directly. These include Uvex, 3M and Honeywell, for example.
6. **Employer:** In many professions, the employer provides the necessary protective equipment. It is therefore worth asking the employer whether and what equipment is provided.

When purchasing personal protective equipment, it is important to pay attention to the quality and the relevant standards and certificates to ensure that the equipment offers the necessary protection.

___________________________________________________________________

5. Does PAP also help with central apnea?

Positive airway pressure (PAP) is a common treatment for obstructive sleep apnea (OSA), but its effectiveness in central sleep apnea (CSA) is more nuanced.

**Obstructive sleep apnea (OSA):** This is a blockage of the upper airway during sleep. PAP devices (such as CPAP - Continuous Positive Airway Pressure) keep the airways open by providing a continuous flow of air, which prevents obstructive apnea.

**Central sleep apnea (CSA):** This type of sleep apnea is caused by a disorder in the regulation of breathing in the brain. The brain does not send the correct signals to the respiratory muscles to breathe regularly.

**Effectiveness of PAP for central sleep apnea**

1. **CPAP (Continuous Positive Airway Pressure)**:
   - CPAP may be helpful in some patients with CSA, especially if CSA is caused by heart failure or altitude exposure.
   - However, CPAP is less effective for pure CSA as it does not address the underlying neurological dysregulation.
2. **BiPAP (Bilevel Positive Airway Pressure)**:
   - BiPAP devices deliver two different pressure levels: a higher pressure on inhalation and a lower pressure on exhalation. This can be more effective for CSA than CPAP as it supports the breathing effort.
3. **Adaptive Servo-Ventilation (ASV)**:
   - ASV devices are specially designed for the treatment of CSA. They continuously monitor the breathing pattern and dynamically adjust the pressure to prevent pauses in breathing and promote regular breathing.
   - ASV has been shown to be very effective in the treatment of CSA, especially in patients with complex sleep apnea (a combination of OSA and CSA).

In summary, while CPAP is primarily suitable for obstructive sleep apnea, more advanced PAP methods such as BiPAP and ASV can also help with central sleep apnea. The specific choice of therapy depends on the exact diagnosis and the individual needs of the patient. A detailed examination and consultation with a sleep physician is essential to determine the best treatment option.

___________________________________________________________________

6. What is PAP titration and how is it carried out?

PAP titration (Positive Airway Pressure Titration) is a diagnostic procedure used in the treatment of sleep apnea. The aim of PAP titration is to determine the optimum air pressure required to keep the airways open during sleep and thus prevent breathing stops.

**Performing the PAP titration:**

1. **Preparation:**
   - **Patient education:** The patient is informed about the PAP titration procedure and it is explained how the device works.
   - **Device setting:** A PAP device (usually a CPAP device - Continuous Positive Airway Pressure) is prepared. The device is connected to a mask that the patient wears during sleep..
2. **Monitoring**
   - **Polysomnography:** Titration is usually carried out as part of a polysomnography (sleep laboratory), in which various bodily functions such as brain activity, eye movements, muscle activity, heart rate, respiratory flow, oxygen saturation and body movements are monitored.
3. **Initial pressure setting:**
   - **Starting pressure:** The titration begins with a low starting pressure, often around 4-5 cm H₂O.
4. **Adjustment of the pressure:**
   - **Gradual increase:** The pressure is increased gradually to prevent breathing stops (apnea) and hypopnea (partial breathing stops).
   - **Monitoring the parameters:** The technician or medical staff continuously monitors the patient's breathing parameters and adjusts the pressure accordingly.
   - **Patient comfort:** Care is also taken to ensure that the patient is comfortable with the pressure and has no discomfort such as air leaks from the mask.
5. **Determination of the optimum pressure:**
   - **Determining the effective pressure:** The optimal pressure is the lowest pressure at which breathing stops and snoring are minimized or eliminated and the oxygen content in the blood remains at a normal level.
   - **Constant pressure:** Once the optimal pressure is found, it is maintained for the rest of the night to confirm effectiveness.
6. **After the titration:**
   - **Evaluation:** The collected data is analyzed to determine the final optimum pressure.
   - **Adjustment of the device:** The patient's CPAP device is adjusted to the determined pressure.

**Aim of the PAP titration:**

- **Symptom relief:** Ensure that the patient can breathe freely during sleep to alleviate the symptoms of sleep apnea (e.g. daytime sleepiness, concentration problems).
- **Improving the quality of sleep:** Improving the quality of sleep by preventing breathing interruptions.
- **Health promotion:** Long-term health benefits such as reducing the risk of high blood pressure, cardiovascular disease and other health problems associated with sleep apnea.

Overall, PAP titration is an important step in the treatment of obstructive sleep apnea and helps to determine the optimal therapy setting for the individual patient.

___________________________________________________________________

7 What are the problems associated with PAP therapy?

PAP (positive airway pressure) therapy, which is often used to treat obstructive sleep apnea, can be associated with various problems and challenges. Here are some of the most common:

1. **Discomfort and adjustment difficulties**:
   - Many patients find it uncomfortable to wear a mask during sleep.
   - Adjustment problems can lead to restless sleep, especially in the first few weeks of therapy.
2. **Mask problems**:
   - Leaking masks can reduce the effect of the therapy and lead to skin irritation.
   - Incorrectly fitting masks can cause pressure sores, pain and even skin infections.
3. **Side effects**:
   - Some patients report nasal dryness, nosebleeds, nasal congestion or skin irritation.
   - Dry mouth can also be a problem, especially if a mouth-nose-mask system is used.
4. **Therapy acceptance and adherence**:
   - Low acceptance and compliance (adherence) are common problems. Many patients do not use the device regularly or give up therapy altogether.
   - Psychological factors such as claustrophobia or fear of the mask can impair use.
5. **Technical problems**:
   - Noise from the device may disturb the sleep of the patient or a partner.
   - Malfunctions or maintenance problems with the device can impair therapy.
6. **Cleaning and hygiene**:
   - Regular cleaning and maintenance of the device and the mask are necessary to prevent infections and ensure proper functioning.
   - Many patients find this time-consuming and inconvenient.
7. **Costs**:
   - The purchase and maintenance of PAP devices can be costly.
   - Not all insurance policies cover the costs in full.
8. **Effectiveness problems**:
   - Not all patients respond equally well to PAP therapy. In some cases, the therapy may not be sufficient to completely control the sleep apnea.

These problems can impair the effectiveness of PAP therapy and lead to patients discontinuing treatment. Close collaboration with the treating physician, regular adjustments and follow-up examinations can help to overcome these challenges and improve treatment outcomes.

___________________________________________________________________

8 Who can I contact if I have problems in connection with PAP therapy?

If you have any problems in connection with PAP (Positive Airway Pressure) therapy, you can contact various bodies:

1. **Your treating doctor**: Your sleep doctor or GP is often the first point of contact. They can discuss specific problems and make possible adjustments to the therapy.
2. **Sleep laboratory**: If your PAP therapy was prescribed as part of a sleep laboratory examination, you can contact the sleep laboratory. There are specialist staff there who specialize in PAP therapy.
3. **Medical professionals**: Nursing staff or specialized therapists who are trained in sleep medicine can also help you.
4. **Manufacturer or supplier of the device**: The supplier of your PAP device often has a customer hotline or technical support that can help with problems with the device itself.
5. **Self-help groups and forums: There** are many self-help groups and online forums where those affected can share their experiences and support each other. There you can get tips and advice from other PAP therapy users.
6. **Pharmacist**: In some cases, the local pharmacist can also be helpful, especially when it comes to accessories or minor adjustments.

It is important that you do not hesitate to seek help if you have problems to ensure that your therapy is effective and comfortable.

___________________________________________________________________

9.Are there any problems with the consistent and regular use of PAP therapy?

Yes, there are some issues and challenges regarding the consistent and regular use of positive airway pressure (PAP) therapy, which is used to treat sleep apnea. Here are some of the most common problems:

1. **Comfort**: Many patients find the masks uncomfortable to wear. Problems such as skin irritation, pressure points and the feeling of tightness can affect their use.
2. **Noise pollution**: Some devices can generate noise during operation that can disturb the sleep of the patient or their partner.
3. **Condensation**: When using heated humidifiers, condensation can accumulate in the hoses, which can be unpleasant and cause noise.
4. **Adjustment problems**: Some patients find it difficult to get used to the feeling of continuous air pressure. This can be particularly problematic at the beginning of therapy.
5. **Dry nasal and oral mucous membranes**: The air flow can lead to dry mucous membranes, which can be uncomfortable and make it difficult to use the therapy.
6. **Complexity of the devices**: Some patients find the operation and maintenance of the devices complicated, which leads to reduced use.
7. **Stigmatization**: Sometimes patients perceive the use of PAP therapy as stigmatizing, especially if they live or travel with others.
8. **Inadequate training**: If patients are not sufficiently trained in how to use and maintain their devices correctly, this can impair the effectiveness of the therapy.

To overcome these challenges, it is important that patients work closely with their doctors and therapists. Device adjustments, selection of the right mask, training and the use of additional devices such as heated humidifiers can help to improve the use of PAP therapy and increase its effectiveness.

___________________________________________________________________

10.I am planning an operation. Do I have to inform my surgeon about my PAP therapy?

Yes, it is very important that you inform your surgeon about your PAP therapy. Positive airway pressure (PAP) therapy, which is often used to treat sleep apnea, can have an impact on anesthesia and the postoperative course. Here are some reasons why your surgeon and anesthesia team should know about your PAP therapy:

1. **Anesthesia planning:** Sleep apnea can increase the risk of complications during anesthesia. Your anesthesiologist can take appropriate measures to ensure that your airway is well protected during surgery.
2. **Post-operative care:** After surgery, it may be important that you continue your PAP therapy to avoid breathing problems. The medical team must be prepared for this and may need to make adjustments.
3. **Avoidance of complications:** Sleep apnea is associated with an increased risk of post-operative complications such as respiratory arrest or heart problems. Knowing your PAP therapy can help minimize these risks.

Therefore, be sure to inform your surgeon and the anesthesia team about your PAP therapy and any other relevant medical conditions and treatments you are receiving. This will help to ensure your safety during and after surgery.

___________________________________________________________________

11.Should I take my PAP device with me when traveling, even abroad?

Yes, it is advisable to take your PAP (Positive Airway Pressure) device with you when traveling, including abroad. Here are some reasons and tips for doing so:

**Reasons why you should take your PAP device with you:**

1. **Continuity of treatment**: The PAP device is crucial for the treatment of sleep apnea. The device helps to prevent breathing interruptions during sleep, which contributes to better sleep and overall health.
2. **Prevention of health problems**: Without the PAP device, symptoms such as tiredness, headaches and difficulty concentrating can return. In the long term, untreated sleep apnoea can lead to serious health problems such as high blood pressure and cardiovascular disease.
3. **Comfort and habit**: If you are used to your PAP device, it can be difficult to sleep without it. It helps to maintain a regular sleep rhythm, which can be especially important when traveling and the environment changes.

**Tips for traveling with a PAP device:**

1. **Airport security**: Inform airport security that you are carrying a medical device. In most cases, it will be recognized as such and treated accordingly.
2. **Power supply**: Check the voltage requirements of your device and get a voltage converter or adapter if necessary, as the voltage and sockets may be different in other countries.
3. **Travel size and transportation**: Many PAP devices are available in portable versions specifically designed for travel. A travel PAP device can be lighter and more compact.
4. **Humidity and hygiene**: If your device has a humidifier, find out about the availability of distilled water at your destination or consider taking it with you. Don't forget to clean the mask and hoses regularly.
5. **Medical certificate**: A certificate from your doctor can be helpful to clarify any questions or problems at the security checkpoint or on the plane.

**Conclusion:**

Taking your PAP device with you when traveling, even abroad, is important to ensure your health and sleep quality. With the right preparation and a few precautions, you can make sure you get a good night's sleep while traveling.

___________________________________________________________________

12.do I have to see my sleep doctor regularly during PAP therapy? If so, for how long?

Yes, during PAP therapy (positive airway pressure therapy), which is used to treat sleep apnea, it is important to see your sleep physician regularly. These regular visits are to monitor the progress of the therapy, make any necessary adjustments and ensure that the therapy is effective.

The frequency and duration of these visits may vary, but here are some general guidelines:

1. **Initial phase of therapy**: In the first weeks to months after starting PAP therapy, more frequent visits are common. This could be monthly or every few months to ensure that you get used to the therapy and do not have any problems.
2. **Long-term monitoring**: Once the therapy is well adjusted and you have become accustomed to it, visits may become less frequent. As a rule, six-monthly or annual check-ups are then sufficient, provided no new problems or changes occur.
3. **Individual adjustments**: The exact frequency of visits depends on individual factors, such as the severity of your sleep apnea, your response to therapy and the occurrence of problems or side effects.

It is important to follow your sleep doctor's recommendations and have regular check-ups to get the best possible results from PAP therapy.

___________________________________________________________________

13.Although I use my PAP machine regularly at night, do I suffer from persistent sleepiness during the day? What is the reason for this and what should I do?

Persistent sleepiness despite regular use of a positive airway pressure (PAP) device can have various causes. Here are some possible reasons and steps you should take:

**Possible causes**

1. **Insufficient treatment effectiveness**: PAP therapy may not be effective enough to fully treat your sleep apnea. This could be due to a device that is not optimally adjusted or a change in your condition.
2. **Sleep duration and quality**: Even with a PAP device, it is important to get enough quality sleep. Other sleep disorders such as insomnia may also play a role.
3. **Lack of adherence**: Even if you use the PAP device regularly, you may not be able to use it long enough or consistently throughout the night.
4. **Comorbidities**: Other medical conditions such as depression, anxiety disorders, thyroid problems or neurological disorders could also contribute to sleepiness.
5. **Side effects of the PAP device**: Sometimes side effects such as mask leakage, pressure sores or nasal problems can affect the quality of sleep.
6. **Sleep hygiene**: Poor sleeping habits or an inadequate sleeping environment could also lead to persistent fatigue.

**Steps you should take**

1. **Follow-up with your sleep doctor**: Make an appointment with your sleep doctor to review your therapy. This could include an adjustment of the device settings or a new sleep study.
2. **Check the device and mask fit**: Make sure your PAP device and mask fit properly and do not leak. Sometimes a different mask type or size is more suitable.
3. **Improve your sleep hygiene**: Make sure to maintain regular sleeping times, create a quiet and dark sleeping environment and avoid stimulants such as caffeine and alcohol before bedtime.
4. **Treatment of other health problems**: Have other possible health causes investigated and treated. This can be done by your family doctor or a specialist.
5. **Advice and support**: A sleep apnea support group or counseling could help you to better manage your condition and get tips on how to improve your sleep quality.
6. **Regular use of the PAP device**: Make sure you use the PAP device every night throughout the night to get the best results.

It is important to discuss the problem with your doctor in order to receive targeted treatment and improve your quality of life.

___________________________________________________________________

14.If my sleepiness improves after taking stimulant medication, why do I need to continue using my PAP therapy?

Even if your sleepiness improves after taking stimulant medication, it is important to continue using positive airway pressure (PAP) therapy if it has been prescribed for you. Here are some reasons why:

1. **Treatment of the underlying cause**: PAP therapy treats the underlying cause of sleep apnoea, namely the pauses in breathing and the associated lack of oxygen supply. Stimulation medication only alleviates the symptoms of sleepiness, but not the cause.
2. **Improving the quality of sleep**: By preventing breathing interruptions, PAP therapy improves the overall quality of sleep, which can lead to better well-being and health in the long term.
3. **Long-term health**: Sleep apnea is associated with several serious health problems, including cardiovascular disease, high blood pressure, stroke and diabetes. PAP therapy helps to reduce these risks.
4. **Prevention of fatigue and accident risk**: Even if stimulation medication helps to reduce daytime sleepiness, the underlying untreated sleep apnea can still lead to unexpected bouts of fatigue and an increased risk of accidents.
5. **Holistic approach**: A combination of PAP therapy and, if necessary, stimulation medication can often be the best strategy to comprehensively treat both sleep apnea and the associated symptoms.
6. **Medication side effects**: Long-term use of stimulant medications can have side effects. PAP therapy, on the other hand, generally has fewer side effects and is a safer long-term treatment option.

Therefore, it is important to continue PAP therapy as directed by your doctor to achieve the best health outcomes. If you have any questions or concerns, you should discuss them with your doctor to develop a treatment strategy tailored to your needs.

___________________________________________________________________

15.Do I need follow-up checks and new therapy settings during PAP therapy? If so, when and how can I find out?

Yes, during PAP therapy (Positive Airway Pressure therapy), follow-up checks and, if necessary, new therapy settings are important. Here are the reasons why and how you can tell when they are necessary:

**Reasons for follow-up checks and therapy adjustments:**

1. **Adjusting the pressure settings**: At the start of therapy, the optimum pressure settings may not yet be precisely defined. It may be necessary to adjust these after a few weeks in order to achieve the best possible effect.
2. **Comfort and tolerance**: There may be problems with the comfort of the mask or the tolerance of the therapy. Follow-up checks help to identify and solve these problems.
3. **Checking the effectiveness of the therapy**: Regular checks ensure that the therapy is effective and that breathing stops (apneas) are successfully reduced.
4. **Device adjustments**: Modern PAP devices often offer different settings and modes that can be optimized to improve therapy.
5. **Changes in health status**: Changes in weight, medication or other health conditions may make it necessary to adjust the therapy.

**When are follow-up checks necessary?**

1. **First follow-up check**: As a rule, a first follow-up check is recommended 2-4 weeks after the start of therapy. This is to check whether the initial settings are correct and whether the patient is coping with the therapy.
2. **Regular checks**: Thereafter, regular check-ups, usually every 3-6 months in the first year, are advisable. Later, these intervals can be extended to annually, depending on the individual situation.
3. **In case of complaints**: If the patient has complaints such as persistent tiredness, sleep disorders, skin irritation caused by the mask or other problems, a follow-up check should be carried out immediately.
4. **Device change or upgrade**: When changing the PAP device or updating the software, a new check is necessary to check and adjust the settings.

**How can you determine whether follow-up checks or adjustments are necessary?**

1. **Observe symptoms**: Watch out for symptoms such as daytime tiredness, headaches, difficulty concentrating or shortness of breath. These can be signs that the therapy is not optimally adjusted.
2. **Evaluate device data**: Modern PAP devices store therapy data such as the number of apnoeas, the pressure values and the duration of use. This data can be read and analyzed by your doctor or sleep laboratory.
3. **Feedback to the doctor**: Report regularly to your doctor about your experiences with the therapy. Your feedback is crucial for adjusting the therapy.

**Summary:**

Follow-up checks and possible new therapy settings are an integral part of PAP therapy to ensure its effectiveness and tolerability. Regular checks and attention to symptoms and device data help to ensure optimal therapy success. If you have any uncertainties or problems, always contact your treating doctor or sleep laboratory.

___________________________________________________________________

16.Do I have to replace the PAP device after a certain time?

Yes, a positive airway pressure (PAP) device, which is commonly used in the treatment of sleep apnea, should be replaced after a certain period of time. The recommended replacement intervals for PAP devices and their accessories vary depending on the manufacturer and insurance company guidelines. Here are some general guidelines:

1. **PAP device**: As a rule, the PAP device should be replaced every 3-5 years. However, this may vary depending on usage and maintenance. It is important to regularly check the condition of the device and ensure that it is working properly.
2. **Masks and nasal pillows**: Masks and nasal pillows should be replaced every 3-6 months, depending on type and use. These parts can wear out and lose their seal, which can impair the effectiveness of the therapy.
3. **Head straps**: The head straps that hold the mask in place should be replaced every 6 months. They can lose their elasticity over time.
4. **Hoses**: The hoses that connect the device to the mask should be replaced every 6-12 months to ensure that there are no tears or holes that could affect the air supply.
5. **Filters**: The filters should be changed regularly depending on the type. Disposable filters usually need to be replaced every 1-2 months, while reusable filters should be cleaned monthly and replaced every 6 months.

It is important to follow the recommendations of the manufacturer and your medical provider to ensure the best possible therapy. Regular maintenance and timely replacement of components will help maximize the effectiveness and lifespan of your PAP device.

___________________________________________________________________

17 I am symptom-free after using the PAP device. Can I stop the therapy? How long do I have to use it?

A positive airway pressure (PAP) device (e.g. CPAP for continuous positive airway pressure) is often used to treat obstructive sleep apnea. It is important to note that freedom from symptoms through the use of the PAP device indicates that the device is effective, but this does not necessarily mean that the underlying condition is cured.

Here are some important points you should consider before discontinuing therapy:

1. **Consultation with a doctor**: Never discontinue therapy without consulting your doctor. The doctor is best placed to assess the severity of your sleep apnea and the course of treatment.
2. **Long-term use**: In many cases, the use of the PAP device is a lifelong therapy. Sleep apnea is often a chronic condition that can recur without continuous treatment.
3. **Risks of discontinuation**: Stopping the PAP device can cause the symptoms of sleep apnea (such as loud snoring, breathing stops and excessive daytime sleepiness) to return. Untreated sleep apnoea can lead to serious long-term health problems such as high blood pressure, cardiovascular disease and strokes.
4. **Alternative therapies**: If you have concerns or difficulties using the PAP device, talk to your doctor about possible alternatives or adjustments to therapy. In some cases, weight loss, surgery or other therapies may be helpful.
5. **Regular check-ups**: Even if you feel symptom-free, regular check-ups are important to ensure that your sleep apnea continues to be well controlled.

In summary, you should not stop treatment with the PAP device on your own authority. Always discuss your freedom from symptoms and the next steps with your doctor to ensure that your health is protected in the long term.

___________________________________________________________________

**HGNS**

1) I cannot tolerate PAP therapy and my sleep doctor has recommended hypoglossal nerve stimulation therapy (HGNS). What is hypoglossal nerve stimulation therapy and how does it affect my obstructive sleep apnea?

Hypoglossal nerve stimulation therapy (HGNS) is a relatively new treatment option for obstructive sleep apnea (OSA), especially for patients who cannot tolerate or do not benefit from positive airway pressure (PAP) therapy. Here is a detailed explanation of what HGNS is and how it works:

**What is hypoglossal nerve stimulation therapy (HGNS)?**

HGNS is a minimally invasive surgical procedure in which a small implantable device is used to stimulate the hypoglossal nerve. This nerve controls tongue movements. The aim of the stimulation is to move the tongue forward during sleep in order to keep the airway open and thus prevent apnea (cessation of breathing).

**How does the HGNS work?**

1. **Implantation of the device**: A small device is surgically implanted under the skin in the upper chest area. A thin cable (electrode) is connected to the hypoglossal nerve in the neck area.
2. **Breathing sensor**: Another part of the system includes a sensor that monitors breathing patterns. This sensor is also implanted under the skin.
3. **Stimulation**: The device recognizes the patient's breathing patterns and sends gentle electrical impulses to the hypoglossal nerve during inhalation. These impulses cause the tongue to move slightly forward, keeping the airway open.
4. **Programming and adjustment**: After implantation, the system is programmed by the doctor and adjusted to the patient's individual needs. Patients can activate the device with a remote control before they go to sleep and switch it off again in the morning.

**Advantages of HGNS**

- **Effectiveness**: Studies have shown that HGNS can significantly reduce the frequency of apneas and hypopneas (partial respiratory arrest).
- **Improved quality of life**: Many patients report improved sleep quality and less daytime sleepiness.
- **Comfort**: Compared to PAP therapy, which often involves a mask and tube, HGNS is less disruptive and can be perceived as more comfortable.

**Possible side effects and risks**

As with any surgical procedure, there are also risks and possible side effects with HGNS:

- **Pain or swelling at the implantation sites**
- **Infections**
- **Discomfort caused by the stimulation (e.g. unpleasant sensations in the tongue or throat area)**

However, these side effects are usually minor and can often be minimized by adjusting the device.

**Suitability for the HGNS**

Not every patient with OSA is a suitable candidate for HGNS. The best results have been achieved in patients who:

- Have moderate to severe obstructive sleep apnea.
- Are not severely overweight (body mass index below a certain value).
- Do not tolerate or refuse PAP therapy.
- Have no medical conditions that would prevent the implantation of a device.

Your sleep physician will perform a thorough examination and evaluation to determine if HGNS is right for you. If you have any questions or concerns, it's important to discuss them directly with your doctor.

___________________________________________________________________

2.is hypoglossal nerve stimulation therapy covered by my insurance (in Germany)?

In Germany, the coverage of Hypoglossal Nerve Stimulation Therapy (HGNS) by health insurance can vary. Generally, this therapy is not the first-line treatment for obstructive sleep apnea (OSA) and is typically considered when Continuous Positive Airway Pressure (CPAP) therapy is ineffective or intolerable. The cost of HGNS devices is significant, often around €20,000, in addition to surgical costs (Advanced Sleep Medicine Services, Inc.) (Sleep Foundation).

Public health insurance (Gesetzliche Krankenversicherung, GKV) in Germany may cover the cost of HGNS on a case-by-case basis. Approval often depends on the specific criteria met by the patient, including failure of CPAP therapy, the severity of sleep apnea, and the patient's overall health status. Private health insurance (Private Krankenversicherung, PKV) might also cover this therapy, but policies and coverage can differ widely.

To determine if your specific insurance plan covers HGNS, it is advisable to directly contact your insurance provider. You may need to provide medical documentation, including previous treatment attempts and the necessity for HGNS as outlined by your healthcare provider (Fortune Business Insights).

___________________________________________________________________

3 What types of hypoglossal nerve stimulation therapy are there and how do they work?

Hypoglossal nerve stimulation therapy (HGNS) is a treatment method for obstructive sleep apnea (OSA). This method stimulates the hypoglossal nerve (lingual nerve) to activate the muscles in the throat and keep the airway open during sleep. There are various systems and technologies for hypoglossal nerve stimulation based on different operating principles. Here are the main types:

1. **Inspire Therapy**:
   - **How it works**: The Inspire system consists of a small, implantable device that is placed under the skin in the upper chest area. It has a respiratory sensor and a stimulator that are connected to the hypoglossal nerve via two electrodes. The respiratory sensor detects the patient's breathing patterns and synchronizes the stimulation of the hypoglossal nerve with the breaths. This activates the tongue muscles to keep the airway open.
   - **Application**: The patient can switch on the system with a remote control before going to bed. It is typically used for patients who do not achieve a sufficient effect with CPAP (Continuous Positive Airway Pressure).
2. **ImThera Therapy** (ZOLL Medical Corporation):
   - **How it works**: Similar to the Inspire system, a small device is implanted that uses electrodes to stimulate the hypoglossal nerve. However, ImThera's aura6000 system uses multiple electrodes to differentially stimulate different branches of the hypoglossal nerve.
   - **Application**: This system can customize stimulation to activate different muscle groups for more targeted and effective airway opening.
3. **Apnex Therapy**:
   - **How it works**: Apnex Medical has developed a system that also uses a respiratory sensor and a stimulator. It works in a similar way to the Inspire therapy by monitoring the patient's breathing and stimulating the hypoglossal nerve in real time to open the airway.
   - **Application**: This system has been tested in clinical trials, but it is currently not as widely used as Inspire.

**Basic functional principles of hypoglossal nerve stimulation**:

- **Detection of breathing patterns**: A breathing sensor detects when the patient breathes in and out. This is crucial for synchronizing the stimulation of the hypoglossal nerve at the right moment.
- **Stimulation of the hypoglossal nerve**: The hypoglossal nerve is stimulated by electrical impulses that are transmitted through implanted electrodes. This stimulation causes the tongue muscles to contract, moving the tongue forward and opening the airway.
- **Synchronization**: The systems are designed to precisely synchronize the stimulation with the breaths to ensure natural and effective airway opening.

**Advantages of hypoglossal nerve stimulation**:

- **Non-invasive during sleep**: As the system is implanted, the patient does not need to wear an external mask or devices.
- **Improved quality of life**: Many patients report an improved quality of life compared to CPAP therapy, especially in terms of comfort and ease of use.
- **Effectiveness**: Studies have shown that hypoglossal nerve stimulation can significantly reduce the apnea-hypopnea index (AHI) and improve daytime sleepiness.

**Potential disadvantages**:

- **Surgical procedure**: Implantation requires a surgical procedure that is associated with the usual risks of an operation.
- **Costs**: The therapy can be expensive and is not always covered by health insurance.
- **Long-term monitoring**: Patients must be monitored regularly to ensure the functionality of the system and to make adjustments.

In summary, hypoglossal nerve stimulation therapy offers an effective alternative for patients with obstructive sleep apnea who do not respond adequately to conventional treatments such as CPAP. Various systems and technologies are available, all of which aim to keep the airway open through targeted stimulation of the hypoglossal nerve.

___________________________________________________________________

4 Where can I get hypoglossal nerve stimulation therapy?

Hypoglossal nerve stimulation therapy (HGNS) is used to treat obstructive sleep apnea (OSA) and is particularly useful for patients who cannot cope with continuous positive airway pressure (CPAP) therapy. There are several clinics in Germany that offer this treatment.

**Clinics in Germany**

- **University Medical Center Schleswig-Holstein**: Offers comprehensive sleep medicine and special therapies for sleep apnea, including HGNS.
- **University Hospital Munich**: Known for advanced treatments in sleep medicine, including hypoglossal nerve stimulation.
- **Charité - Universitätsmedizin Berlin**: One of the largest university hospitals in Europe, offering a variety of treatments for sleep disorders.

**Treatment requirements and procedures**

- **Eligibility**: Patients should have previously tried CPAP therapy, have a BMI of 35 or less and be sufficiently healthy for a two-hour surgery (Home) (SleepApnea.org).
- **Preparation**: An endoscopy to examine the airways is performed to check suitability for implantation (Home).
- **Operation**: The implantation is performed on an outpatient basis under general anesthesia. A generator and electrode sensors are implanted under the skin to stimulate the hypoglossal nerve and thus activate the tongue muscles and keep the airways open (Sleep Foundation) (SleepApnea.org).
- **Aftercare**: After the operation, the device is adjusted and activated around six weeks later. Regular follow-up examinations are necessary to monitor the effectiveness and adjust the device if necessary (SleepApnea.org).

**Further information and contact**

For more detailed information and to make an appointment, please visit the website of the respective clinic or contact them directly.

If you are considering this therapy, it is advisable to consult your GP or a sleep medicine specialist to obtain a referral to a suitable clinic.

___________________________________________________________________

5Does hypoglossal nerve stimulation therapy also help with central apnea?

Hypoglossal nerve stimulation therapy, also known as Inspire therapy, is mainly used to treat obstructive sleep apnea (OSA). This therapy stimulates the hypoglossal nerve (lingual nerve) to activate the tongue muscles and thus keep the airways open during sleep.

Central sleep apnoea (CSA), on the other hand, is a problem with the central control of breathing in the brain, in which the brain does not send any signals for breathing. The mechanisms of development and treatment approaches are therefore different compared to obstructive sleep apnoea.

To date, there is insufficient evidence that hypoglossal nerve stimulation therapy is effective for central sleep apnea. Treatment of CSA often requires other approaches, such as adaptive servo-ventilation (ASV), continuous or bi-level positive airway pressure therapy (CPAP or BiPAP), medication or oxygen therapy, depending on the underlying cause and severity of the apneas.

It is always advisable to seek advice from a sleep physician to determine the most appropriate treatment option based on the individual diagnosis and specific circumstances.

___________________________________________________________________

6 What is titration under hypoglossal nerve stimulation therapy and how is it performed?

Titration under hypoglossal nerve stimulation therapy refers to the process of fine-tuning stimulation settings to provide optimal therapy for patients with obstructive sleep apnea (OSA). Hypoglossal nerve stimulation (HGNS) is a treatment for OSA in which an implanted device stimulates the hypoglossal nerve to activate the tongue muscles during sleep to keep the airway open.

**Carrying out the titration**

1. **Implantation of the device**: The HGNS device is surgically implanted. The system consists of a respiratory sensor, a stimulation generator and an electrode that stimulates the hypoglossal nerve.
2. **Initial programming**: After the healing phase, the device is activated and programmed for the first time. This usually takes place in a sleep clinic or a specialized center. The initial settings are based on the patient's feedback and the observed sleep parameters.
3. **Sleep study (polysomnography)**: A controlled sleep study is carried out to check the effectiveness of the initial settings. During the study, the device is activated and various stimulation settings are tested. The sleep study includes monitoring of EEG, ECG, respiratory flow, oxygen saturation and other relevant parameters.
4. **Adjustment of the stimulation parameters**: Based on the results of the sleep study, the stimulation parameters are adjusted. This may include changes in stimulation intensity, stimulation frequency and timing. The aim is to find the best balance between the effectiveness of the therapy and comfort for the patient.
5. **Long-term monitoring and readjustment**: After the initial adjustment, the patient continues to be monitored regularly to ensure that the therapy remains effective and no unpleasant side effects occur. Further adjustments may be necessary if the patient's sleep patterns or weight change or if new clinical information becomes available.

**Aim of the titration**

The main goal of titration is to find the optimal stimulation setting that keeps the patient's airway open during sleep and thus minimizes the symptoms of obstructive sleep apnoea. The parameters are set to improve sleep quality and reduce the risk of complications such as cardiovascular problems.

**Conclusion**

Titration under hypoglossal nerve stimulation therapy is a crucial step in adapting the therapy to the patient's individual needs. Through careful monitoring and continuous adjustments, effective and comfortable treatment of obstructive sleep apnea can be achieved.

___________________________________________________________________

7 What are the problems and risks associated with hypoglossal nerve stimulation therapy?

Hypoglossal nerve stimulation therapy is a treatment method used in patients with obstructive sleep apnea (OSA) to stimulate the tongue during sleep in order to keep the airway open. Although this therapy can help many patients, there are also some problems and risks associated with it:

1. **Surgical risks**: Because implantation of the stimulator requires surgery, there are the general risks associated with surgery, such as infection, bleeding, and reactions to anesthesia.
2. **Nerve damage**: There is a risk that the hypoglossal nerve or surrounding nerves may be damaged during surgery, which can lead to numbness, pain or weakness in the tongue and neighboring structures.
3. **Device advancement**: The implanted stimulator could shift or slip out of its original position, which could lead to reduced effectiveness of the therapy or further complications.
4. **Device malfunctions**: The stimulator could fail or malfunction, which could require reoperation to repair or replace the device.
5. **Pain and discomfort**: Some patients report pain, discomfort or a foreign body sensation at the implantation site, which can occur particularly shortly after the operation.
6. **Sensation of stimulation**: Patients may find stimulation unpleasant or have difficulty adjusting to it, which could affect sleep.
7. **Difficulty swallowing**: Stimulation of the hypoglossal nerve can cause problems with swallowing, as tongue movements can be affected.
8. **Costs and maintenance: The** costs for the implant and aftercare can be considerable. The device's batteries also need to be checked regularly and possibly replaced, which requires further interventions.
9. **Limited suitability**: Not all patients with obstructive sleep apnea are suitable candidates for this therapy. Patients must meet certain anatomical and medical criteria in order to benefit from hypoglossal nerve stimulation.
10. **Long-term risks**: Long-term data on the efficacy and safety of hypoglossal nerve stimulation are limited, and there may still be unknown long-term risks.

Despite these risks and problems, hypoglossal nerve stimulation can be an effective treatment option for many patients with obstructive sleep apnea, especially when other therapeutic approaches such as CPAP (Continuous Positive Airway Pressure) are not tolerated or are not effective. It is important that patients receive a thorough consultation and evaluation by a specialized physician to assess the suitability and potential risks of the therapy.

___________________________________________________________________

8 Who should I contact if I have problems in connection with hypoglossal nerve stimulation therapy?

If you have any problems in connection with hypoglossal nerve stimulation therapy, you should contact the following persons or institutions:

1. **Your treating doctor or surgeon**: The first point of contact should always be the doctor or surgeon who prescribed or carried out the therapy. He or she knows your medical history and can give specific advice.
2. **Sleep specialists**: As hypoglossal nerve stimulation therapy is often used for sleep apnea, sleep specialists or sleep laboratories can provide valuable support.
3. **Implant manufacturer**: Contact the manufacturer of the hypoglossal nerve stimulation device. Many manufacturers offer dedicated customer support services and can provide technical support or advice on your device.
4. **Dentists or orthodontists**: If your problems are related to the placement of the appliance in your mouth, a dentist or orthodontist may be able to help.
5. **Health insurance**: Your health insurance company may also be able to provide you with information or support, especially when it comes to questions of cost coverage or billing.
6. **Self-help groups**: Exchanging ideas with other sufferers in self-help groups or online forums can also be helpful. Here you can benefit from the experiences of others and get practical tips.

Make sure you keep detailed notes about your symptoms and problems so that you have this information to hand at the consultation.

___________________________________________________________________

9.are there any problems with the consistent and regular use of hypoglossal nerve stimulation therapy?

Hypoglossal nerve stimulation therapy (HNS) is a relatively new treatment for obstructive sleep apnea (OSA) in which an implantable device stimulates the hypoglossal nerve to keep the upper airway open during sleep. Although this therapy is promising, there are some potential problems and challenges with its consistent and regular use:

1. **Implantation risks**: As with any surgical procedure, there is a risk of complications during implantation of the device, such as infection, bleeding or nerve injury.
2. **Device complications**: There may be technical problems with the device, such as malfunctions or battery failures, which could require re-operation to rectify.
3. **Cost**: HNS therapy is expensive, both in terms of implantation costs and long-term maintenance. This can limit accessibility and long-term use, especially in countries without sufficient health insurance coverage.
4. **Comfort and acceptance**: Some patients find the sensation of stimulation uncomfortable or disturbing, which can affect regular use. Getting used to the device can take time.
5. **Long-term effects**: Because HNS therapy is relatively new, there is limited data on long-term efficacy and safety. Long-term studies are needed to understand potential long-term effects.
6. **Indication**: HNS therapy is not suitable for all patients with OSA. It is usually recommended for patients who cannot tolerate other treatments, such as CPAP (Continuous Positive Airway Pressure) therapy, or for whom it is not effective. The selection of suitable candidates is crucial for the success of the therapy.
7. **Regular follow-up care**: Patients must be monitored regularly by a doctor to check the function of the device and make adjustments if necessary. This requires continuous medical care, which can be a burden for some patients.

In summary, hypoglossal nerve stimulation therapy offers a promising alternative for the treatment of obstructive sleep apnea, but the potential problems and challenges mentioned need to be considered for long-term use.

___________________________________________________________________

10.I am planning an operation. Do I have to inform my surgeon about my hypoglossal nerve stimulation therapy?

Yes, it is very important that you tell your surgeon about your hypoglossal nerve stimulation therapy. Here are some reasons why:

1. **Medical history:** The surgeon needs to know your full medical history to avoid possible complications during the operation.
2. **Anesthesia planning:** The anesthesiologist must be aware of all implants and medical devices you are wearing to ensure that these devices will not be affected during surgery.
3. **Post-operative care:** Your surgical team needs to know that you are receiving hypoglossal nerve stimulation therapy in order to adjust your post-operative care accordingly.
4. **Avoidance of complications:** Certain surgical procedures or positioning during surgery could affect or be affected by the stimulator. Timely information helps to minimize such risks.

So be sure to inform your surgeon and the entire medical team about your therapy to ensure safe and effective treatment.

EVALUATION:
1. coherence (Likert scale 1 = very good; 6 = very poor):
2. comprehensibility (Likert scale 1 = very good; 6 = very poor):
 3. conciseness (Likert scale 1 = very good; 6 = very poor):
4.Medically adequate / quality of answer from a medical point of view (Likert scale 1 = very good; 6 = very poor):
5.Medically complete? (binary: yes/no):
 6.Is the patient put at risk by the information/recommendation? (binary: yes/no):

___________________________________________________________________

11.Should I take all my equipment for hypoglossal nerve stimulation therapy with me when I travel, even when traveling abroad?

Yes, it's important to take all your hypoglossal nerve stimulation therapy equipment with you when you travel, even when traveling abroad. Here are some reasons and tips on why and how you should do this:

1. **Continuity of therapy**: Regular use of hypoglossal nerve stimulation therapy is crucial for its effectiveness. Interruptions can impair the success of the therapy.
2. **Safety and well-being**: Regular use of the therapy ensures that you feel safe and comfortable. Without the equipment, your symptoms could worsen, which could affect your vacation or trip.
3. **Spare parts and accessories**: It is advisable to take spare parts such as additional electrodes or batteries with you in case something gets lost or broken.
4. **Travel documentation**: Take documents with you that explain what hypoglossal nerve stimulation therapy is and that you need this medical equipment. This can be helpful at airport security checks.
5. **Adapters and power supply**: Find out about the power supply at your destination and take suitable adapters and voltage converters with you if necessary.
6. **Emergency medical information**: Carry information about your therapy and your doctor's contact information with you in case you need medical help.

In summary, bringing all your equipment for hypoglossal nerve stimulation therapy is crucial for your health and well-being while traveling. Plan ahead and make sure you have everything you need with you.

___________________________________________________________________

12.Do I need regular follow-up visits with my sleep physician during hypoglossal nerve stimulation therapy? If so, for how long?

Yes, regular follow-ups with your sleep physician are required during hypoglossal nerve stimulation therapy. These follow-ups are crucial to monitor the effectiveness of the therapy, make any adjustments to the device and ensure that no complications occur.

As a rule, the follow-up examinations comprise the following phases:

1. **Acclimatization phase**: In the first few months after implantation, more frequent follow-up visits are necessary, typically every few weeks. These visits serve to optimize the stimulation settings and ensure that the therapy is working correctly.
2. **Long-term monitoring: After** the acclimatization phase, follow-up visits become less frequent, often every 3 to 6 months during the first year. These visits help to evaluate the long-term effectiveness of the therapy and make any necessary adjustments.
3. **Regular check-ups**: After the first year, annual check-ups are usual. These check-ups serve to check the general state of health, the function of the stimulator and the quality of sleep.

The exact frequency and duration of follow-up visits may vary depending on individual needs and responses to therapy. It is important to follow the recommendations of your sleep physician and attend all scheduled appointments to ensure the best possible results from hypoglossal nerve stimulation therapy.

___________________________________________________________________

13.although I use hypoglossal nerve stimulation therapy regularly at night, I am still sleepy during the day? What is the reason for this and what should I do?

There are several possible reasons why you may still be sleepy at night during the day despite regular use of hypoglossal nerve stimulation therapy. Here are some potential causes and steps you can take:

**Possible causes**

1. **Inadequate therapy setting:**
   - The settings of your device may not be optimal. It may be necessary to adjust the stimulation settings to ensure a more effective treatment.
2. **Compliance:**
   - Check that you are using the device every night and for the entire duration of your sleep. Irregular use can impair the effectiveness of the therapy.
3. **Other sleep disorders:**
   - You may have another sleep disorder, such as restless legs syndrome, insomnia or narcolepsy, which is causing your daytime sleepiness.
4. **Medications or substances:**
   - Certain medications or substances (such as alcohol or caffeine) can affect the quality of sleep and lead to daytime sleepiness.
5. **Health conditions:**
   - Other health problems such as depression, anxiety disorders, thyroid problems or chronic pain can contribute to fatigue.

**Steps for improvement**

1. **Aftercare and adjustment checks:**
   - Make an appointment with your sleep specialist or the doctor who prescribed the hypoglossal nerve stimulation therapy to check the device settings and adjust them if necessary.
2. **Improve sleep hygiene:**
   - Make sure you have good sleeping habits, such as regular sleeping times, a relaxing sleep ritual and a sleep-friendly environment.
3. **Additional diagnostics:**
   - Have further investigations carried out to rule out or diagnose other sleep disorders or medical conditions.
4. **Review of medications:**
   - Talk to your doctor about any medications you are taking to see if they could be contributing to your drowsiness.
5. **Lifestyle changes:**
   - Reduce the consumption of caffeine and alcohol, especially in the hours before bedtime. Regular physical activity can also improve the quality of sleep.
6. **Psychological support:**
   - Consider psychological or psychiatric help if stress, anxiety or depression may be playing a role in your fatigue.

By taking these steps and working closely with your doctor, you may be able to identify the cause of your daytime sleepiness and take appropriate steps to improve your sleep quality and alertness during the day.

___________________________________________________________________

14.if my sleepiness improves after taking stimulation medication, why do I need to continue using hypoglossal nerve stimulation therapy?

Hypoglossal nerve stimulation (HNS) therapy and pacing medications target different aspects of sleep disorders, especially when it comes to obstructive sleep apnea (OSA). Here are some reasons why it may be important to continue using HNS therapy even if you experience improvement in your sleepiness with stimulation medication:

1. **Addressing the cause of sleep apnea**: HNS therapy is aimed directly at treating the cause of obstructive sleep apnea by stimulating the muscles in the throat to keep the airway open during sleep. This helps to reduce or eliminate the apnea episodes.
2. **Sleepiness symptoms vs. apnea episodes**: Stimulant medications can help reduce sleepiness by increasing alertness. However, they do not address the actual pauses in breathing caused by OSA. HNS therapy directly treats these pauses in breathing.
3. **Long-term health**: Untreated OSA can lead to serious long-term health problems, such as high blood pressure, cardiovascular disease, strokes and diabetes. Even if the symptoms of sleepiness are relieved, these health risks remain if the OSA itself is not treated.
4. **Combination therapy**: In many cases, a combination of different therapies may be required to achieve optimal treatment of the symptoms and the underlying condition. HNS therapy and stimulant medication can complement each other to treat both daytime sleepiness and nocturnal apnea episodes.
5. **Individual response**: Patients respond differently to different treatments. It is possible that sleepiness is relieved by stimulant medication but apnea episodes are not sufficiently reduced. HNS therapy may still be necessary to achieve complete control of OSA.

To summarize, HNS therapy provides direct treatment for OSA, while stimulant medications primarily address the symptoms of sleepiness. Together, both treatments can provide a more comprehensive solution to your sleep disorder. It is important not to confuse the therapies and to continue both as directed by your doctor for the best health outcomes.

___________________________________________________________________

15.do I have to have the therapy setting checked regularly during hypoglossal nerve stimulation therapy? If so, at what intervals?

Yes, during hypoglossal nerve stimulation therapy (HGNS therapy), the therapy settings must be checked regularly and adjusted if necessary. The exact intervals for these checks may vary depending on the individual treatment plan and the recommendations of the attending physician.

As a rule, the first follow-up check after implantation and activation of the system takes place within a few weeks to a month. Subsequently, follow-up appointments are often scheduled every 3 to 6 months. These regular check-ups are important to ensure that the system is functioning optimally and that the therapy is achieving the desired results.

However, the exact interval between check-ups may vary from person to person and should be discussed with your doctor. It is important to attend all recommended check-ups and to consult your doctor if you experience any problems or changes in your sleep behavior.

___________________________________________________________________

16.do parts of the hypoglossal nerve stimulation device implant have to be replaced after a certain time? Is a new operation necessary for this? If so, is this possible under local anesthesia?

Yes, after a certain period of time, parts of the hypoglossal nerve stimulation device, in particular the battery, must be replaced. This is usually necessary as the battery loses capacity over time.

Replacing the battery does indeed require another operation. Whether this operation is performed under local or general anesthesia depends on various factors, including the patient's preferences and the medical practice of the attending physician or surgeon.

In some cases, the exchange can be performed under local anesthesia, especially if the patient cannot tolerate general anesthesia for medical reasons. More often, however, general anesthesia is preferred to keep the patient more comfortable and ensure an optimal surgical environment.

It is important to discuss these issues with the attending physician or surgeon to determine the best course of action for the individual case.

___________________________________________________________________

17 I am symptom-free after using hypoglossal nerve stimulation therapy. Can I stop the therapy? How long do I have to use it?

It is great to hear that you are symptom-free after using hypoglossal nerve stimulation therapy! However, the decision to discontinue or continue therapy should not be made on your own. Here are some points you should consider:

1. **Consult your doctor**: Consult your doctor or specialist. He or she will be able to assess your specific situation and give you sound medical advice.
2. **Long-term effectiveness**: Hypoglossal nerve stimulation therapy is designed to be used on a long-term basis. The success of the therapy often depends on continued use. Discontinuation of therapy may increase the risk of recurrence of symptoms.
3. **Individual differences**: Every patient reacts differently to the therapy. Some patients may require lifelong use, while others may be able to stop after a certain period of time. This depends on factors such as the severity of the sleep apnea, general health and response to therapy.
4. **Monitoring your symptoms**: Even if you are currently symptom-free, it is important to continue to monitor your symptoms. It may be useful to have regular check-ups to ensure that the sleep apnea does not return.
5. **Aftercare and alternative options**: If your doctor is considering discontinuing therapy, he or she may also suggest alternative treatment options or a gradual reduction in therapy.

**To summarize:** Do not discontinue therapy without first consulting your doctor. Your doctor will give you the best recommendation based on your individual situation and weigh up the need for continued treatment.
